---

## Multivariate Characterization of Morpho-biometric Traits of Indigenous Helmeted Guinea Fowl (*Numida meleagris*) in Nigeria

Short title: Morpho-biometrical Characteristics of Nigerian Indigenous Guinea Fowl

Abdulmojeed Yakubu<sup>1\*</sup>, Praise Jegede<sup>1,2</sup>, Mathew Wheto<sup>3</sup>, Ayoola J. Shoyombo<sup>4\*\*</sup>, , Ayotunde O. Adebambo<sup>3\*\*\*</sup>, Mustapha A. Popoola<sup>5</sup>, Osamede H. Osaiyuwu<sup>6</sup>, Olurotimi A. Olafadehan<sup>7</sup>, Olayinka O. Alabi<sup>4</sup>, Comfort I. Ukim<sup>5</sup>, Samuel T. Vincent<sup>1</sup>, Harirat L. Mundi<sup>1,8</sup>, Adeniyi Olayanju<sup>4</sup> and Olufunmilayo A. Adebambo<sup>3</sup>

- 1 Department of Animal Science, Faculty of Agriculture, Nasarawa State University, Keffi, Shabu-Lafia Campus, 950101, Lafia, Nigeria
- 2 National Biotechnology Development Agency, Abuja, Nigeria
- 3 Department of Animal Breeding and Genetics, Federal University of Agriculture, Abeokuta, Nigeria
- 4 Department of Animal Science, Landmark University, Omu-Aran, Nigeria
- 5 Tertiary Education Trust Fund, Abuja, Nigeria
- 6 Department of Animal Science, Faculty of Agriculture, University of Ibadan, Ibadan, Nigeria
- 7 Department of Animal Science, Faculty of Agriculture, University of Abuja, Abuja, Nigeria
- 8 Department of Animal Science, Faculty of Agriculture, Federal University of Lafia, Lafia, Nigeria
- \* Corresponding authors: [abdulkubu@nsuk.edu.ng](mailto:abdulkubu@nsuk.edu.ng) (AY); [shoyombo.ayoola@lmu.edu.ng](mailto:shoyombo.ayoola@lmu.edu.ng) (AJS); [tumininuadebambo@gmail.com](mailto:tumininuadebambo@gmail.com) (AOA)

1  
2  
3  
4  
5  
6  
7  
8  
18  
20  
21  
22  
23  
26

27

## Abstract

28

This study was embarked upon to characterise phenotypically helmeted guinea fowls in three agro-ecologies in Nigeria using multivariate approach. Eighteen biometric characters, four morphological indices and eleven qualitative (phaneroptic) traits were investigated in a total of 569 adult birds (158 males and 411 females). Descriptive statistics, non-parametric Kruskal–Wallis H test followed by the Mann–Whitney U test for post hoc, Multiple Correspondence Analysis (MCA), General Linear Model, Canonical Discriminant Analysis, Categorical Principal Component Analysis and Decision Trees were employed to discern the effects of agro-ecological zone and sex on the morphostructural parameters. Agro-ecology had significant effect ( $P < 0.05$ ;  $P < 0.01$ ) on all the colour traits. In general, the most frequently observed colour phenotype of guinea fowl had pearl plumage colour (54.0%), pale red skin colour (94.2%), black shank colour (68.7%), brown eye colour (49.7%), white earlobe colour (54.8%) and brown helmet colour (72.6%). The frequencies of helmet shape and wattle size were significantly influenced ( $P < 0.01$ ) by agro-ecology and sex. Overall, birds from the Southern Guinea Savanna zone had significantly higher values ( $P < 0.05$ ) for most biometric traits compared to their Sudano-Sahelian and Tropical Rainforest counterparts. They were also more compact ( $120.83 \pm 1.61$  vs.  $113.96 \pm 0.97$  vs.  $111.33 \pm 1.19$ ) and had lesser condition index ( $8.542 \pm 0.17$  vs.  $9.92 \pm 0.10$  vs.  $9.61 \pm 0.13$ ) than their counterparts in the two other zones. The interaction between agro-ecology and sex had significant effect ( $P < 0.05$ ) on some quantitative variables. The MCA and discriminant analysis revealed considerable intermingling of the phaneroptic, biometric traits and body indices especially between the Sudano-Sahelian and Tropical Rainforest birds. In spite of the high level of genetic admixture, the guinea fowl populations could best be distinguished using wing length, body length and eye colour. However, further complementary work on genomics will guide future selection and breeding programmes geared towards improving the productivity, survival and environmental adaptation of indigenous helmeted guinea fowls in the tropics.

29

30

31

32

33

34

35

36

37

38

39

40

41

42

43

44

45

**Keywords:** Guinea fowl; improvement; phenotypic variation; decision algorithms; tropics

46

47

47

## Introduction

Poultry species serve as important sources of animal protein and household income, especially for low-input and marginalized rural communities [1,2,3]. The helmeted guinea fowl (*Numida meleagris*) belongs to the Galliformes order and the Numididae family. The game bird is terrestrial and commonly found in Africa [4]. The birds are indigenous to West Africa North of the Equatorial forest and are believed to have originated from the coast of Guinea in West Africa [5]. Based on evidence from archaeozoology and art, it was suggested that Mali and Sudan were centres of domestication of this species and this might have occurred about 2,000 years BP [6]. In Nigeria, the Guinea fowl is a common game bird found mainly in the Savanna region of Northern Nigeria [7]. Guinea fowl farmers are basically involved in three major production systems: These include the Extensive System (Free range), Semi-intensive System (Partial confinement) and the Intensive System (Complete enclosure) [8]. In comparison with chicken, guinea fowl is economically more attractive in the tropics because it is not very demanding in terms of its diet, more rustic and adapts better to traditional farming system [9,10,11]. Guinea fowl is also highly valued for its meat and eggs. The meat is rich in vitamins and contains less cholesterol and fats, thereby making it a high quality protein source [12]. Additionally, the bird is used for different cultural purposes, and plays a role in poverty reduction among rural dwellers [13]. The bird also breeds seasonally and reaches its peak breeding activity during the summer period [14].

Every livestock species or breed is a veritable component of the animal genetic diversity of the world that deserves immense attention [15]. 65

Despite the usefulness of guinea fowl, it is poorly characterised in the tropics. This has limited its value as an unexploited potential for economic 66

and industrial growth. Therefore, there is need for proper characterisation geared mainly towards improvement in meat and egg production. The 67

first step in such characterisation as outlined by FAO [16] involves the use of phenotypic characteristics which are aspects of physical 68

appearance or other body parameters that can be measured qualitatively and quantitatively [17]. Variations in phenotypes have remained [18], 69

and tolerance or susceptibility of birds to stressful environment could be linked to their phenotypic traits [19,20]. Hence, the need to understand 70

such phenotypic diversity in the helmeted Guinea fowls especially in populations that have adapted to local environmental conditions. Under 71

resource-poor settings, phenotypic approach is fundamental in livestock management because it is simple, fast, and cost-effective [21]. Also, 72

morpho-biometrical characterization (qualitative and quantitative traits) will enable proper selection of elite animals, breeding, conservation and 73

sustainable use of indigenous animal resources [22,23]. Qualitative traits such as plumage colour, skin colour, shank colour, eye colour, helmet 74

shape, wattle possession and skeleton structure are useful to farmers and breeders for identification and classification of guinea fowl and to meet 75

consumer preferences for specific phenotypic traits [24]. On the other hand, biometric measurements such as body weight, body length, chest 76

circumference, wing length, wingspan and shank length are useful in breeding programmes, to reevaluate local breeds, allow the preservation of 77

animal biodiversity and support consumer demands [25,26]. When such morphometric traits are considered jointly, multifactorial analyses have 78  
been shown to assess better the within-population variation which can be utilized in the discrimination of different population types [25,27]. 79  
In Nigeria, south Saharan Africa, there is dearth of information on the phenotypic diversity of guinea fowls [28]. The current study, therefore, 80  
was embarked upon to characterise morphologically guinea fowl in Nigeria using qualitative traits and linear body measurements. The 81  
knowledge of the morpho-biometrical traits will support the implementation of breeding and conservation strategies in order to guarantee the 82  
survival and continuous production of the guinea fowl genetic resource in the tropics for improved food security and livelihoods. 83

## **Materials and Methods**

 84

### **Ethics Statement**

 85

In order to properly carry out the research, we adhered strictly to the ethical guidelines of the Global code of conduct for research in resource- 87  
poor settings [29] following the Convention on Biological Diversity and Declaration of Helsinki. Although the study did not involve the 88  
collection of blood and other tissue samples, we obtained field approval from the Research and Publication Directorate of Nasarawa State 89  
University, Keffi through permit no NSUK/FAC/ANS/GF100. 90

91

92

## Study Area

93

The study was carried out in Nasarawa State and Abuja (Southern Guinea Savanna zone), Bauchi and Kano States (Sudano-Sahelian zone) and 94  
Ogun and Oyo States (Tropical Rainforest zone) of Nigeria. The choice of sites was informed by the relative availability of indigenous and 95  
exotic guinea fowls and ease of data collection. The climates and vegetations of Nasarawa State and Abuja have been described in an earlier 96  
study [30]. Bauchi State is located strategically between latitudes 9°30' and 12°30' North of the equator and between longitudes 8°45' and 11°0' 97  
East of the Greenwich meridian. The State has two distinct ecological zones; namely, the Sudan savannah and the Sahel savannah. While the 98  
Sudan savannah covers the Southern part of the State where the vegetation gets richer and richer towards the South, the Sahel (semi-desert 99  
vegetation) covers the Western and Northern parts of the State, with characteristic features of isolated strands of horny shrubs and sandy soils 100  
[31]. The mean daily temperature is highest in April (30.0°C) and lowest in December (22.1°C) [32]. The average relative humidity ranges from 101  
35% in February to 94% in August. Monthly rainfall ranges from 0.0mm in December and 0.5mm in January to about 340mm in August. Kano 102  
State is part of the Sudano-Sahelian zone of Nigeria and is located approximately between longitudes 8° 45 E and 12° 05 E latitudes 10° 30 N 103  
and 13° 02 N. The natural vegetation is a mixture of Sudan Savannah and Sahel thorn shrubs species, which are 104  
sparsely distributed over the entire area, with variation in density from one place to another [33]. The mean annual rain-fall is within the range of 105

800 mm to 900 mm, with the wet season lasting from May to mid-October and peaks in August while the dry season extends from mid-October 106  
to mid-May. The mean annual temperature is about 26°C [34]. 107

Ogun State located between on latitude 6°12'N and 7°47'N and longitude 3°0'E and 5°0'E. Vegetationally, the State is characterized mainly by 108  
tropical rainforest,. The average temperature value varies from one month to another, with a minimum average of 25.7 °C in July and a 109  
maximum of 30.2 °C in February. The State has two distinct seasons (wet and dry) with mean annual rainfall value ranging between 1,400 and 110  
1,500 mm [35]. Oyo State is found on latitude 8°.00'N and longitude 4°.00'E. It is characterized by humid rain forest vegetation. The average 111  
temperature ranges between 25.0 °C and 35.0 °C. The wet season starts from April and ends in October while the dry season lasts from 112  
November to March. The rainfall pattern is bimodal with annual mean value of 1250 mm [36]. 113

### **Sampling Procedure**

 114 115

A total of five hundred and sixty nine (569) adult (8 months of age) Nigerian indigenous guinea fowls [Southern Guinea Savanna: 109 birds (27 116  
males and 82 females); Sudano-Sahelian: 290 birds (80 males and 190 females) and Tropical Rainforest: 190 birds (51 males and 139 females)] 117  
were utilized in the study. The indigenous birds were randomly sampled in smallholder rural farmers flocks and managed under the traditional 118  
low-input settings. Multistage sampling procedure was purposively and randomly adopted in the selection of States, Local Government Areas 119

(LGAs), villages and guinea fowl keepers in each agro-ecological zone. States, LGAs and villages were purposively selected based on the 120  
knowledge of the availability of guinea fowls in the communities as provided by the local Extension Agents and Community Heads. The number 121  
of sampling locations varied [4 LGAs and 11 villages (Southern Guinea Savanna); 5 LGAs and 15 villages (Sudano-Sahelian); 4 LGAs and 13 122  
villages (Tropical Rainforest)]. Based on willingness to participate in the research, eleven individuals were then randomly selected from each 123  
village making a total of 429 households (n=121, 165 and 143 for Southern Guinea Savanna, Sudano-Sahelian and Tropical Rainforest, 124  
respectively). 125

### **Data Collection**

 126

Data collection was done in the rainy season month of April to June, 2020. Morphologically distinct Guinea fowls were identified using 127  
phenotypic traits based on the standard descriptors by FAO [16], AU-IBAR [37] and the colour chart of Guinea fowl by GFIA [38]. The sexes 128  
were distinguished through visualisation of the vent and the use of helmet shape as well as wattle size and shape [28]. Eleven qualitative 129  
(phaneroptic) parameters such as plumage colour, skin colour, shank colour, eye colour, earlobe colour, helmet colour, helmet shape, wattle 130  
possession, wattle size, wattle shape and skeletal structure were used to characterize the guinea fowls morphologically. For quantitative 131  
(biometric) description, the following body parts were measured: 132

Body weight (kg): The live weight of the guinea fowl. 133



|                                                                                                                           |     |
|---------------------------------------------------------------------------------------------------------------------------|-----|
| Head length (cm): Taken between the most protruding point of the occipital and the frontal (lacrima) bone.                | 134 |
| Head thickness (cm): Head thickness measured as the circumference at the middle of the head                               | 135 |
| Helmet length (cm): Measured as the distance between the base of the head to the tip of the helmet                        | 136 |
| Helmet width (cm): Measured as the distance between the broadest part of the helmet                                       | 137 |
| Wattle length (cm): Taken as the distance between the base of the beak and the tip of the wattle                          | 138 |
| Wattle width (cm): Measured as the distance between the broadest part of the wattle                                       | 139 |
| Neck length (cm): Distance between the occipital condyle and the cephalic borders of the coracoids.                       | 140 |
| Neck circumference: Taken at the widest point of the neck                                                                 | 141 |
| Wing length (cm): Taken from the shoulder joint to the extremity of the terminal phalanx, digit 111.                      | 142 |
| Wing Span: Distance between the two wings when stretched out.                                                             | 143 |
| Body length (cm): The distance from the first cervical vertebra (Atlas) to the posterior end of the ischium               | 144 |
| Trunk Length (cm): The distance between shoulder joint and posterior edge of the ischium,                                 | 145 |
| Keel length (cm): Keel length (Sternum or breast bone) measured from the anterior point of the keel to the posterior end. | 146 |
| Chest circumference (cm): This was taken as the circumference of the body around the breast region.                       | 147 |

|                                                                                                                                           |     |
|-------------------------------------------------------------------------------------------------------------------------------------------|-----|
| Thigh length (cm): Distance between the hock joint and the pelvic joint;                                                                  | 148 |
| Thigh circumference (cm): Measured as the circumference at the widest point of the thigh;                                                 | 149 |
| Shank length: Shank length was measured as the distance between the foot pad and the hock joint.                                          | 150 |
| Shank thickness: Shank thickness was measured as the circumference at the middle or widest part of the shank.                             | 151 |
| Also, the following conformation indices were estimated [39]:                                                                             | 152 |
| Massiveness: The ratio of live body weight to trunk length x 100                                                                          | 153 |
| Compactness: The ratio of chest circumference to trunk length x 100                                                                       | 154 |
| Long-leggedness: The ratio of shank length to body length x 100                                                                           | 155 |
| Condition index: The ratio of live body weight to wing length × 100.                                                                      | 156 |
| The weight measurement was taken using a hanging digital scale (WeiHeng Brand), the width measurements were taken using a vernier caliper | 157 |
| (0.01 mm precision) while the length and circumference measurements were taken using a flexible tape measure.                             | 158 |
| <b>Statistical Analysis</b>                                                                                                               | 159 |
| <b>Descriptive Statistics</b>                                                                                                             | 160 |

Descriptive statistics were computed to determine the frequencies of the qualitative traits. Where statistical significant differences in the frequencies were obtained at agro-ecological and sex levels, they were assessed using the non-parametric Kruskal–Wallis H test followed by the Mann–Whitney U test for post hoc separation [40] of IBM-SPSS software (2020).

### **Correspondence Analysis**

Multiple Correspondence analysis (MCA) was used to establish the relationships between the qualitative traits: Wattle possession and skeleton structure had zero variance and were excluded from the MCA using JMP 16 [41] statistical software.

### **Factorial Analysis**

General linear model (GLM) of IBM-SPSS software [42] was employed to test the fixed effects of agro-ecology and sex as well as their interaction on quantitative variables. Significant means were separated using Least Significant Difference (LSD) method at  $P < 0.05$  level.

The general linear model employed was:

$$Y_{ijk} = \mu + A_i + S_j + (AS)_{ij} + e_{ijk}$$

$Y_{ijk}$  = individual observation

$\mu$  = population mean

$A_i$  =  $i^{\text{th}}$  agro-ecology fixed effect ( $i$  = southern guinea savanna, sudano-sahelian, tropical rainforest). 175

$S_j$  =  $j^{\text{th}}$  sex fixed effect ( $j$  = male, female) 176

$(AS)_{ij}$  =  $i^{\text{th}}$  agro-ecology and  $j^{\text{th}}$  sex interaction effect 177

$e_{ijk}$  = random error associated with each record 178

### **Stepwise Canonical Discriminant Analysis** 179

Canonical discriminant analysis [43] option of IBM-SPSS [42] statistical software was applied to classify birds in the three agro-ecological 180

zones based on quantitative traits. In the analysis, all the eighteen biometric traits and four conformation indices (covariates) were entered in a 181

stepwise fashion as explanatory variables to establish and outline population clusters [44] based on agro-ecology. F-to-remove statistics was the 182

criterion for variables' selection while multicollinearity was detected among the variables in the discriminant function using tolerance statistics. 183

The ability of this discriminant model to identify birds in the Southern Guinea Savanna, Sudano-Sahelian and Tropical Rainforest zones was 184

indicated as the percentage of individuals correctly classified from the sample that generated the model. The accuracy of the classification was 185

evaluated using split-sample validation (cross-validation). 186

### **Categorical Principal Component Analysis** 187

Categorical principal component analysis (CATPCA) procedure was employed to explore hidden relationships among the qualitative and 188  
quantitative traits as described by Martin-Collado et al. [45]. This was to allow for appropriate grouping of the guinea fowls based on agro- 189  
ecology and sex. The PCs were extracted based on Eigen values greater than 1 criterion. The convergence was 0.00001 with maximum iterations 190  
of 100. The PC matrix was rotated using the varimax criterion with Kaiser Normalization to facilitate easy interpretation of the analysis. The 191  
reliability of the PCA was tested using Chronbach's alpha using IBM-SPSS [42]. 192

### **Decision Trees**

 193

CHAID and Exhaustive CHAID algorithms were employed to assign the birds into agro-ecological zones using the qualitative and quantitative 194  
traits as the predictor variables. CHAID is a tree-based model with merging, partitioning and stopping stages that recursively uses multi-way 195  
splitting procedures to form homogenous subsets using Bonferroni adjustment until the least differences between the predicted and actual values 196  
in a response variable are obtained [46]. It produces terminal nodes and finds the best possible variable or factor to split the node into two child 197  
nodes. The Exhaustive CHAID, as a modification of CHAID algorithm, applies a more detailed merging and testing of predictor variables [47]. 198  
The goodness-of-fit criterion to assess the efficiency of the CHAID and Exhaustive CHAID models was the risk value including its associated 199  
standard error. IBM-SPSS [42] software was also used for the Decision Trees' analysis 200

### **Results**

 201

## Distribution of the Qualitative Traits

202

The frequency distribution of the colour traits of indigenous helmeted guinea fowl are shown in Table 1. Agro-ecology significantly affected (P<0.05; P <0.01) all the six traits investigated. No definite pattern of variation in each class of the colour traits was observed among the three agro-ecological zones. Generally, the most frequent colour phenotype of helmeted guinea fowl in Nigeria had pearl plumage colour (54.0%), pale red skin colour (94.2%), black shank colour (68.7%), brown eye colour (49.7%), white earlobe colour (54.8%) and helmet colour (72.6%). However, sex did not significantly influence (P>0.05) all the six colour traits.

203

204

205

206

207

**Table 1.** Frequency (%) of colour traits of indigenous helmeted guinea fowl based on agro-ecology and sex

209

| Traits         | Class    | Agro-ecology                           |                             |                                     | Total | Kruskall<br>-Wallis<br>test | Sex           |                 | Total | Kruskal<br>l-Wallis<br>test |
|----------------|----------|----------------------------------------|-----------------------------|-------------------------------------|-------|-----------------------------|---------------|-----------------|-------|-----------------------------|
|                |          | Southern<br>Guinea<br>Savanna<br>n=109 | Sudano-<br>Sahelia<br>n=270 | Tropical<br>Rainfores<br>t<br>n=190 |       |                             | Male<br>n=158 | Female<br>n=411 |       |                             |
| Plumage colour | Pearl    | 12.3                                   | 26.9                        | 14.8                                | 54.0  | 9.69**                      | 16.0          | 38.0            | 54.0  | 0.28 <sup>ns</sup>          |
|                | Lavender | 1.1                                    | 1.2                         | 2.8                                 | 5.1   |                             | 1.1           | 4.0             | 5.1   |                             |
|                | Black    | 1.9                                    | 7.4                         | 6.3                                 | 15.6  |                             | 3.5           | 12.1            | 15.6  |                             |
|                | White    | 0.0                                    | 0.9                         | 1.8                                 | 2.6   |                             | 0.7           | 1.9             | 2.6   |                             |
|                | Brown    | 3.9                                    | 5.3                         | 4.4                                 | 13.5  |                             | 3.3           | 10.2            | 13.5  |                             |
|                | Pied     | 0.0                                    | 5.8                         | 3.3                                 | 9.1   |                             | 3.2           | 6.0             | 9.1   |                             |
|                | Total    |                                        |                             |                                     | 100   |                             |               |                 | 100   |                             |
| Skin colour    | Dark     | 5.8                                    | 0.0                         | 0.0                                 | 5.8   | 147.58**                    | 1.6           | 4.2             | 5.8   | 0.004 <sup>ns</sup>         |
|                | Pale red | 13.4                                   | 47.5                        | 33.4                                | 94.2  |                             | 26.2          | 68.0            | 94.2  |                             |
|                | Total    |                                        |                             |                                     | 100   |                             |               |                 | 100   |                             |
| Shank colour   | Orange   | 0.5                                    | 0.0                         | 0.0                                 | 0.5   | 25.61**                     | 0.0           | 0.5             | 0.5   | 2.16 <sup>ns</sup>          |
|                | Black    | 8.8                                    | 33.6                        | 26.4                                | 68.7  |                             | 18.1          | 50.6            | 68.7  |                             |

|                |                      |      |      |      |      |         |      |      |      |                    |
|----------------|----------------------|------|------|------|------|---------|------|------|------|--------------------|
|                | White                | 0.0  | 3.2  | 2.8  | 6.0  |         | 2.1  | 3.9  | 6.0  |                    |
|                | Brown                | 0.7  | 5.4  | 3.0  | 9.1  |         | 3.2  | 6.0  | 9.1  |                    |
|                | Peach Black          | 7.2  | 4.4  | 1.2  | 12.8 |         | 3.5  | 9.3  | 12.8 |                    |
|                | Pale Pink            | 1.4  | 0.0  | 0.0  | 1.4  |         | 0.2  | 1.2  | 1.4  |                    |
|                | Pale Red             | 0.0  | 0.7  | 0.0  | 0.7  |         | 0.2  | 0.5  | 0.7  |                    |
|                | Red                  | 0.0  | 0.2  | 0.0  | 0.2  |         | 0.2  | 0.0  | 0.2  |                    |
|                | Pink With Black Spot | 0.2  | 0.0  | 0.0  | 0.2  |         | 0.2  | 0.0  | 0.2  |                    |
|                | Black-Orange         | 0.4  | 0.0  | 0.0  | 0.4  |         | 0.2  | 0.2  | 0.4  |                    |
|                | Total                |      |      |      | 100  |         |      |      | 100  |                    |
| Eye colour     | White                | 1.9  | 3.9  | 2.1  | 7.9  | 91.86** | 2.3  | 5.6  | 7.9  | 1.27 <sup>ns</sup> |
|                | Brown                | 17.2 | 21.8 | 10.7 | 49.7 |         | 14.8 | 35.0 | 49.7 |                    |
|                | Pink                 | 0.0  | 0.9  | 0.0  | 0.9  |         | 0.4  | 0.5  | 0.9  |                    |
|                | Black                | 0.0  | 20.4 | 20.0 | 40.4 |         | 10.2 | 30.2 | 40.4 |                    |
|                | Bluish               | 0.0  | 0.5  | 0.5  | 1.1  |         | 0.2  | 0.9  | 1.1  |                    |
|                | Total                |      |      |      | 100  |         |      |      | 100  |                    |
| Earlobe colour | White                | 4.9  | 26.4 | 23.6 | 54.8 | 59.63** | 15.5 | 39.4 | 54.8 | 0.22 <sup>ns</sup> |
|                | Dirty White          | 0.0  | 1.2  | 0.5  | 1.8  |         | 0.5  | 1.2  | 1.8  |                    |
|                | Bluish               | 0.0  | 0.5  | 0.0  | 0.5  |         | 0.2  | 0.4  | 0.5  |                    |
|                | White Bluish         | 0.0  | 1.1  | 0.5  | 1.6  |         | 0.4  | 1.2  | 1.6  |                    |
|                | Spotted              | 4.9  | 8.4  | 4.0  | 17.4 |         | 4.9  | 12.5 | 17.4 |                    |
|                | Whitish Brown        | 0.0  | 1.2  | 0.4  | 1.6  |         | 0.4  | 1.2  | 1.6  |                    |
|                | Brown                | 6.0  | 7.9  | 4.2  | 18.1 |         | 5.4  | 12.7 | 18.1 |                    |
|                | Black                | 0.2  | 0.2  | 0.0  | 0.4  |         | 0.2  | 0.2  | 0.4  |                    |
|                | Pale Pink            | 1.9  | 0.0  | 0.0  | 1.9  |         | 0.0  | 1.9  | 1.9  |                    |
|                | Pink                 | 1.2  | 0.0  | 0.0  | 1.2  |         | 0.4  | 0.9  | 1.2  |                    |
|                | Purple               | 0.0  | 0.5  | 0.2  | 0.7  |         | 0.0  | 0.7  | 0.7  |                    |
|                | Total                |      |      |      | 100  |         |      |      | 100  |                    |
| Helmet colour  | Purple               | 0.0  | 0.2  | 0.0  | 0.2  | 53.17** | 0.0  | 0.2  | 0.2  | 0.03 <sup>ns</sup> |
|                | Brown                | 9.3  | 37.6 | 25.7 | 72.6 |         | 20.6 | 52.0 | 72.6 |                    |
|                | Black                | 2.3  | 6.3  | 6.2  | 14.8 |         | 3.3  | 11.4 | 14.8 |                    |
|                | Red                  | 7.6  | 2.8  | 1.6  | 12.0 |         | 3.5  | 8.4  | 12.0 |                    |
|                | Pink                 | 0.0  | 0.5  | 0.0  | 0.5  |         | 0.4  | 0.2  | 0.5  |                    |

Total 100 100

---

n= No. of birds observed; \* P <0.01; ns Not significant 210

The frequencies of helmet shape and wattle size were significantly affected by agro-ecology (P <0.01) (Table 2). While most of the birds had single helmet shape (50.8%), which appeared to be more in the Sudano-Sahelian and Tropical Rainforest zones, wattle size did not follow a definite pattern. All the birds in the three agro-ecologies had wattle and were skeletally normal (P >0.01). However, sex had a significant effect (P <0.01) on helmet shape (where more females were single), wattle size (where that of males appeared larger) and wattle shape (where more females carried theirs flat).

**Table 2.** Frequency (%) of helmet shape, wattle possession, size and shape including skeletal structure of indigenous helmeted guinea fowl based on agro-ecology and sex 221

| Traits       | Class            | Agro-ecology                           |                             |                                     | Total | Kruskal<br>l-Wallis<br>test | Sex           |                 | Total | Kruskal<br>-Wallis<br>test |
|--------------|------------------|----------------------------------------|-----------------------------|-------------------------------------|-------|-----------------------------|---------------|-----------------|-------|----------------------------|
|              |                  | Southern<br>Guinea<br>Savanna<br>n=109 | Sudano-<br>Sahelia<br>n=270 | Tropical<br>Rainfores<br>t<br>n=190 |       |                             | Male<br>n=158 | Female<br>n=411 |       |                            |
| Helmet shape | Slanted Backward | 13.0                                   | 5.3                         | 4.0                                 | 22.3  | 43.61**                     | 6.2           | 16.2            | 22.3  | 94.57**                    |
|              | Single           | 0.2                                    | 29.3                        | 21.3                                | 50.8  |                             | 1.8           | 49.0            | 50.8  |                            |
|              | Erect            | 6.0                                    | 12.8                        | 8.1                                 | 26.9  |                             | 19.9          | 7.0             | 26.9  |                            |
|              | Total            |                                        |                             |                                     | 100   |                             |               |                 | 100   |                            |



|                    |             |      |      |      |       |                     |      |      |      |                      |
|--------------------|-------------|------|------|------|-------|---------------------|------|------|------|----------------------|
| Wattle possession  | Present     | 19.2 | 47.5 | 33.4 | 100.0 | 0.00 <sup>ns</sup>  | 27.8 | 72.2 | 100  | 0.00 <sup>ns</sup>   |
|                    | Absent      | 0.0  | 0.0  | 0.0  | 0.0   |                     | 0.0  | 0.0  | 0.0  |                      |
|                    | Total       |      |      |      | 100   |                     |      |      | 100  |                      |
| Wattle size        | Large       | 12.7 | 23.7 | 13.4 | 49.7  | 18.79 <sup>**</sup> | 23.9 | 25.8 | 49.7 | 115.34 <sup>**</sup> |
|                    | Small       | 6.5  | 23.7 | 20.0 | 49.7  |                     | 3.9  | 46.4 | 50.3 |                      |
|                    | Total       |      |      |      | 100   |                     |      |      | 100  |                      |
| Wattle shape       | Cupped      | 5.1  | 13.9 | 8.8  | 27.8  | 0.47 <sup>ns</sup>  | 27.2 | 0.5  | 27.8 | 526.89 <sup>**</sup> |
|                    | Flat        | 14.1 | 33.0 | 24.3 | 71.4  |                     | 0.5  | 70.8 | 71.4 |                      |
|                    | Cupped Flat | 0.0  | 0.5  | 0.4  | 0.9   |                     | 0.0  | 0.9  | 0.9  |                      |
|                    | Total       |      |      |      | 100   |                     |      |      | 100  |                      |
| Skeletal structure | Normal      | 19.2 | 47.5 | 33.4 | 100   | 0.00 <sup>ns</sup>  | 27.8 | 72.2 | 100  | 0.00 <sup>ns</sup>   |
|                    | Creeper     | 0.0  | 0.0  | 0.0  | 0.0   |                     | 0.0  | 0.0  | 0.0  |                      |
|                    | Polydactyl  | 0.0  | 0.0  | 0.0  | 0.0   |                     | 0.0  | 0.0  | 0.0  |                      |

n= No. of birds observed; \*\* Significant at P <0.01; ns Not significant

222

223

224

### **Biplot of the Multiple Correspondence Analysis**

225

The MCA revealed the association between the qualitative traits and agro-ecological zones in two dimensions (Figure 1). The first dimension 226

was high and represented 93.2% of the deviation from independence while the second dimension signified 6.8% of the total variation based on 227

the inertia. The agro-ecological zones were not clustered perfectly (as can be seen in the low inertia values of 0.168 and 0.012) considering the 228

intermingling of some qualitative traits. This was more noticeable between birds in the Sudano-Sahelian and Tropical Rainforest zones. 229

Therefore, discrimination of the traits appears very weak. However, on the right hand side of the biplot, peach black, orange and pale pink shank colour, dark skin colour, red and slanted backward helmet seemed to be more associated with the Southern Guinea Savanna zone.

**Fig 1.** A biplot showing the relationship between the qualitative traits and agro-ecological zones

### *The Fixed Effects of Quantitative Variables*

The results of the univariate analysis revealed significant effect ( $P < 0.05$ ) of agro-ecology on the biometric traits and morphological indices of the guinea fowls (Table 3). Overall, birds from the Southern Guinea Savanna zone had significantly higher values ( $P < 0.05$ ) for most zoometrical traits compared to their Sudano-Sahelian and Tropical Rainforest counterparts. However, the former only differed ( $P < 0.05$ ) from the later in body weight ( $91.47 \pm 0.02$  vs.  $1.42 \pm 0.02$ ), wattle width ( $1.66 \pm 0.03$  vs.  $1.53 \pm 0.04$ ) and chest circumference ( $29.66 \pm 0.24$  vs.  $28.83 \pm 0.29$ ). As regards conformation indices, Southern Guinea Savanna birds were more compact ( $120.83 \pm 1.61$  vs.  $113.96 \pm 0.97$  vs.  $111.33 \pm 1.19$ ) and had lesser condition index ( $8.542 \pm 0.17$  vs.  $9.92 \pm 0.10$  vs.  $9.61 \pm 0.13$ ) than those of Sudano-Sahelian and Tropical Rainforest. Sex significantly influenced ( $P < 0.05$ ) only the biometric traits as the males had higher head thickness, helmet length, wattle length, wattle width, wing length, wing span, body length, trunk length, chest circumference and thigh length (Table 4).

245  
246  
247  
248  
249  
250  
251  
252  
253  
254  
255  
256

**Table 3.** Effect of agro-ecology on the quantitative traits (Mean±S.E.) of indigenous helmeted guinea fowls

| Traits              | Agro-ecology            |                          |                         | P-value |
|---------------------|-------------------------|--------------------------|-------------------------|---------|
|                     | Southern Guinea Savanna | Sudano-Sahelian          | Tropical Rainforest     |         |
| Body weight         | 1.49±0.03 <sup>a</sup>  | 1.47±0.02 <sup>a</sup>   | 1.42±0.02 <sup>b</sup>  | 0.048   |
| Head length         | 4.49±0.05 <sup>b</sup>  | 4.76±0.03 <sup>a</sup>   | 4.71±0.04 <sup>a</sup>  | 0.001   |
| Head thickness      | 10.84±0.07 <sup>b</sup> | 11.09±0.04 <sup>a</sup>  | 11.04±0.05 <sup>a</sup> | 0.009   |
| Helmet length       | 2.31±0.06 <sup>a</sup>  | 1.96±0.04 <sup>b</sup>   | 1.99±0.05 <sup>b</sup>  | 0.001   |
| Helmet width        | 1.64±0.04 <sup>a</sup>  | 1.37±0.03 <sup>b</sup>   | 1.33±0.03 <sup>b</sup>  | 0.001   |
| Wattle length       | 2.36±0.05               | 2.33±0.03                | 2.30±0.04               | 0.695   |
| Wattle width        | 1.88±0.06 <sup>a</sup>  | 1.66±0.03 <sup>b</sup>   | 1.53±0.04 <sup>c</sup>  | 0.001   |
| Neck length         | 14.03±0.20 <sup>a</sup> | 11.58±0.12 <sup>b</sup>  | 11.24±0.15 <sup>b</sup> | 0.001   |
| Neck circumference  | 8.02±0.13 <sup>a</sup>  | 7.215±0.08 <sup>b</sup>  | 7.226±0.09 <sup>b</sup> | 0.001   |
| Wing length         | 17.88±0.18 <sup>a</sup> | 14.86±0.11 <sup>b</sup>  | 14.73±0.13 <sup>b</sup> | 0.001   |
| Wing Span           | 38.88±0.29 <sup>a</sup> | 35.48±0.17 <sup>b</sup>  | 35.09±0.21 <sup>b</sup> | 0.001   |
| Body length         | 38.65±0.51 <sup>a</sup> | 36.36±0.30 <sup>b</sup>  | 35.65±0.37 <sup>b</sup> | 0.001   |
| Trunk Length        | 26.81±0.23 <sup>a</sup> | 26.14±0.14 <sup>b</sup>  | 25.98±0.17 <sup>b</sup> | 0.010   |
| Keel length         | 11.23±0.11 <sup>a</sup> | 11.03±0.06 <sup>ab</sup> | 10.83±0.08 <sup>b</sup> | 0.008   |
| Chest circumference | 32.24±0.40 <sup>a</sup> | 29.66±0.24 <sup>b</sup>  | 28.83±0.29 <sup>c</sup> | 0.001   |
| Thigh length        | 11.64±0.12 <sup>a</sup> | 10.85±0.07 <sup>b</sup>  | 10.68±0.09 <sup>b</sup> | 0.001   |

|                 |                          |                          |                          |       |
|-----------------|--------------------------|--------------------------|--------------------------|-------|
| Shank length    | 7.39±0.06 <sup>a</sup>   | 7.04±0.03 <sup>b</sup>   | 7.01±0.04 <sup>b</sup>   | 0.001 |
| Shank thickness | 4.10±0.10 <sup>b</sup>   | 5.45±0.06 <sup>a</sup>   | 5.39±0.08 <sup>a</sup>   | 0.001 |
| Massiveness     | 5.57±0.12                | 5.68±0.07                | 5.49±0.09                | 0.225 |
| Compactness     | 120.83±1.61 <sup>a</sup> | 113.96±0.97 <sup>b</sup> | 111.33±1.19 <sup>b</sup> | 0.001 |
| Long-leggedness | 19.17±0.23 <sup>b</sup>  | 19.62±0.14 <sup>ab</sup> | 19.88±0.17 <sup>a</sup>  | 0.042 |
| Condition index | 8.542±0.17 <sup>b</sup>  | 9.92±0.10 <sup>a</sup>   | 9.61±0.13 <sup>a</sup>   | 0.001 |

Means within rows with P < 0.05 are significantly different

257

258

259

**Table 4.** Effect of sex on the quantitative traits (Mean±S.E.) of indigenous helmeted guinea fowls

261

| Traits              | Sex        |            | P-value |
|---------------------|------------|------------|---------|
|                     | Male       | Female     |         |
| Body weight         | 1.48±0.02  | 1.44±0.01  | 0.136   |
| Head length         | 4.67±0.04  | 4.64±0.02  | 0.617   |
| Head thickness      | 11.08±0.05 | 10.91±0.03 | 0.006   |
| Helmet length       | 2.17±0.05  | 2.00±0.03  | 0.003   |
| Helmet width        | 1.48±0.03  | 1.42±0.02  | 0.131   |
| Wattle length       | 2.38±0.04  | 2.28±0.03  | 0.036   |
| Wattle width        | 1.77±0.04  | 1.61±0.03  | 0.003   |
| Neck length         | 12.37±0.16 | 12.19±0.10 | 0.352   |
| Neck circumference  | 7.57±0.10  | 7.41±0.06  | 0.151   |
| Wing length         | 16.08±0.14 | 15.57±0.09 | 0.002   |
| Wing Span           | 36.80±0.23 | 36.17±0.14 | 0.018   |
| Body length         | 37.47±0.40 | 36.30±0.24 | 0.012   |
| Trunk Length        | 26.67±0.18 | 25.95±0.11 | 0.001   |
| Keel length         | 11.08±0.08 | 10.98±0.05 | 0.304   |
| Chest circumference | 30.66±0.32 | 29.82±0.19 | 0.022   |
| Thigh length        | 11.21±0.10 | 10.90±0.06 | 0.006   |
| Shank length        | 7.18±0.04  | 7.11±0.03  | 0.131   |

|                 |             |             |       |
|-----------------|-------------|-------------|-------|
| Shank thickness | 5.06±0.08   | 4.90±0.05   | 0.098 |
| Massiveness     | 5.59±0.09   | 5.57±0.06   | 0.903 |
| Compactness     | 115.48±1.27 | 115.26±0.76 | 0.881 |
| Long-leggedness | 19.36±0.18  | 19.75±0.11  | 0.060 |
| Condition index | 9.33±0.14   | 9.38±0.08   | 0.754 |

Means within rows with P <0.05 are significantly different

262

263

264

265

266

267

### The Interaction Effects of Quantitative Variables

268

The interaction between agro-ecology and sex only had significant effect (P <0.05) on some quantitative variables where the male had an edge

269

over the female in the three agro-ecological zones (Table 5). In the Sudano-Sahelian zone, the body weight of males (1.53±0.03) was higher than

270

that of the females (1.42±0.02) likewise keel length (11.20±0.11 vs. 10.85±0.07), massiveness (5.86±0.12 vs. 5.51±0.08) and condition index

271

(10.14±0.18 vs. 9.69±0.11). Similar pattern was observed in helmet length, (2.57±0.11 vs. 2.04±0.06), wattle length (2.53±0.09 vs. 2.19±0.05)

272

and neck circumference (8.29±0.23 vs. 7.76±0.13) in the Southern Guinea Savanna zone.

273

274

**Table 5.** Agro-ecology and sex interaction effect on the quantitative traits (Mean±S.E.) of indigenous helmeted guinea fowls

275

| Traits      | Southern Guinea Savanna |                        | Sudano-Sahelian        |                        | Tropical Rainforest    |                        | P-value |
|-------------|-------------------------|------------------------|------------------------|------------------------|------------------------|------------------------|---------|
|             | Male                    | Female                 | Male                   | Female                 | Male                   | Female                 |         |
| Body weight | 1.48±0.05 <sup>a</sup>  | 1.50±0.03 <sup>a</sup> | 1.53±0.03 <sup>a</sup> | 1.42±0.02 <sup>b</sup> | 1.43±0.04 <sup>a</sup> | 1.41±0.02 <sup>a</sup> | 0.049   |
| Head length | 4.54±0.09               | 4.44±0.05              | 4.79±0.05              | 4.72±0.03              | 4.67±0.06              | 4.76±0.04              | 0.147   |

|                     |                        |                        |                         |                         |                        |                        |       |
|---------------------|------------------------|------------------------|-------------------------|-------------------------|------------------------|------------------------|-------|
| Head thickness      | 10.93±0.12             | 10.75±0.07             | 11.20±0.07              | 10.98±0.05              | 11.10±0.09             | 10.98±0.85             | 0.729 |
| Helmet length       | 2.57±0.11 <sup>a</sup> | 2.04±0.06 <sup>b</sup> | 1.96±0.06 <sup>a</sup>  | 1.96±0.04 <sup>a</sup>  | 1.98±0.08 <sup>a</sup> | 2.00±0.05 <sup>a</sup> | 0.001 |
| Helmet width        | 1.66±0.07              | 1.61±0.04              | 1.40±0.04               | 1.35±0.03               | 1.38±0.05              | 1.29±0.03              | 0.879 |
| Wattle length       | 2.53±0.09 <sup>a</sup> | 2.19±0.05 <sup>b</sup> | 2.34±0.06 <sup>a</sup>  | 2.32±0.04 <sup>a</sup>  | 2.28±0.07 <sup>a</sup> | 2.32±0.04 <sup>a</sup> | 0.015 |
| Wattle width        | 1.99±0.10              | 1.77±0.06              | 1.76±0.06               | 1.56±0.04               | 1.55±0.07              | 1.51±0.04              | 0.208 |
| Neck length         | 14.14±0.35             | 13.92±0.20             | 11.64±0.20              | 11.52±0.13              | 11.32±0.25             | 11.15±0.15             | 0.972 |
| Neck circumference  | 8.29±0.23 <sup>a</sup> | 7.76±0.13 <sup>b</sup> | 7.10±0.13 <sup>a</sup>  | 7.33±0.08 <sup>a</sup>  | 7.32±0.16 <sup>a</sup> | 7.13±0.10 <sup>a</sup> | 0.022 |
| Wing length         | 18.26±0.32             | 17.50±0.18             | 15.11±0.18              | 14.60±0.12              | 14.86±0.23             | 14.60±0.14             | 0.524 |
| Wing Span           | 39.28±0.50             | 38.49±0.28             | 35.89±0.29              | 35.07±0.19              | 35.22±0.36             | 34.96±0.22             | 0.562 |
| Body length         | 39.40±0.88             | 37.91±0.50             | 37.11±0.51              | 35.60±0.33              | 35.90±0.64             | 35.39±0.39             | 0.558 |
| Trunk Length        | 27.52±0.39             | 26.11±0.23             | 26.44±0.23              | 25.84±0.15              | 26.06±0.29             | 25.89±0.17             | 0.092 |
| Keel length         | 11.07±0.18             | 11.39±0.11             | 11.20±0.11 <sup>a</sup> | 10.85±0.07 <sup>b</sup> | 10.96±0.13             | 10.70±0.08             | 0.023 |
| Chest circumference | 32.60±0.69             | 31.87±0.40             | 30.32±0.40              | 29.00±0.26              | 29.07±0.50             | 28.59±0.31             | 0.516 |
| Thigh length        | 11.89±0.21             | 11.38±0.12             | 11.00±0.12              | 10.70±0.08              | 10.75±0.16             | 10.62±0.09             | 0.448 |
| Shank length        | 7.46±0.10              | 7.31±0.06              | 7.08±0.06               | 7.01±0.04               | 7.01±0.07              | 7.00±0.04              | 0.527 |
| Shank thickness     | 4.25±0.18              | 3.95±0.10              | 5.54±0.10               | 5.36±0.07               | 5.38±0.13              | 5.39±0.08              | 0.445 |
| Massiveness         | 5.40±0.21 <sup>a</sup> | 5.74±0.12 <sup>a</sup> | 5.86±0.12 <sup>a</sup>  | 5.51±0.08 <sup>b</sup>  | 5.51±0.15 <sup>a</sup> | 5.47±0.09 <sup>a</sup> | 0.038 |
| Compactness         | 119.09±2.8             | 122.57±1.61            | 115.44±1.63             | 112.47±1.05             | 111.92±2.04            | 110.75±1.23            | 0.231 |
| Long-leggedness     | 19.02±0.39             | 19.32±0.23             | 19.31±0.23              | 19.93±0.15              | 19.75±0.29             | 20.01±0.17             | 0.681 |
| Condition index     | 8.27±0.30 <sup>a</sup> | 8.81±0.17 <sup>a</sup> | 10.14±0.18 <sup>a</sup> | 9.69±0.11 <sup>b</sup>  | 9.59±0.22 <sup>a</sup> | 9.64±0.13 <sup>a</sup> | 0.038 |

Means within rows with P < 0.05 are significantly different

276

277

278

279

### Spatial Representation of Birds

Based on Wilks' Lambda (0.326-0.663) and F statistics (41.855-143.662) (Table 6), wing length, shank thickness, massiveness, neck 280

circumference, head thickness, condition index, long-leggedness, neck length, thigh length and wattle length were the significant (P<0.001) 281

parameters of importance to separate birds in the Southern Guinea Savanna, Sudano-Sahelian and Tropical Rainforest zones. However, there 282

was considerable spatial intermixing of the biometric traits largely observed between birds in the Sudano-Sahelian and Tropical Rainforest zones 283  
(Figure 2). The predicted group membership of the three agro-ecological zones is shown in Table 7. The classification results showed that 88.1, 284  
51.9 and 55.8% of birds in the Southern Guinea Savanna, Sudano-Sahelian and Tropical Rainforest zones were correctly assigned to their 285  
distinct groups. The three respective group cases were 57.1% cross-validated. 286

**Table 6.** Traits of importance in the discriminant analysis to separate birds in the three agro-ecological zones 288

| <b>Traits</b>      | <b>Wilk's Lambda</b> | <b>F-value</b> | <b>P-Level</b> | <b>Tolerance</b> |
|--------------------|----------------------|----------------|----------------|------------------|
| Wing length        | 0.663                | 143.662        | 0.001          | 1.000            |
| Shank thickness    | 0.562                | 94.269         | 0.001          | 0.990            |
| Massiveness        | 0.506                | 76.328         | 0.001          | 0.764            |
| Neck circumference | 0.465                | 65.712         | 0.001          | 0.925            |
| Head thickness     | 0.420                | 61.016         | 0.001          | 0.785            |
| Condition index    | 0.387                | 56.756         | 0.001          | 0.131            |
| Long-leggedness    | 0.362                | 52.956         | 0.001          | 0.726            |
| Neck length        | 0.343                | 49.427         | 0.001          | 0.729            |
| Thigh length       | 0.332                | 45.638         | 0.001          | 0.577            |
| Wattle length      | 0.326                | 41.855         | 0.001          | 0.582            |

**Fig 2.** Canonical discriminant function illustrating the distribution of the guinea fowls among the agro-ecological zones 292

293  
294  
295  
296  
297  
298  
299

**Table 7.** Assignment of birds to the three agro-ecological zones

300

|                       | Agro-ecology            | Predicted group membership |        |                 | Total |                     |
|-----------------------|-------------------------|----------------------------|--------|-----------------|-------|---------------------|
|                       |                         | Southern Savanna           | Guinea | Sudano-Sahelian |       | Tropical Rainforest |
| Original count        | Southern Guinea Savanna | 96                         |        | 8               | 5     | 109                 |
|                       | Sudano-Sahelian         | 12                         |        | 140             | 118   | 270                 |
|                       | Tropical Rainforest     | 3                          |        | 81              | 106   | 190                 |
| %                     | Southern Guinea Savanna | 88.1                       |        | 7.3             | 4.6   | 100.0               |
|                       | Sudano-Sahelian         | 4.4                        |        | 51.9            | 43.7  | 100.0               |
|                       | Tropical Rainforest     | 1.6                        |        | 42.6            | 55.8  | 100.0               |
| Cross-validated count | Southern Guinea Savanna | 93                         |        | 9               | 7     | 109                 |
|                       | Sudano-Sahelian         | 12                         |        | 132             | 126   | 270                 |
|                       | Tropical Rainforest     | 3                          |        | 87              | 100   | 190                 |
| %                     | Southern Guinea Savanna | 85.3                       |        | 8.3             | 6.4   | 100.0               |
|                       | Sudano-Sahelian         | 4.4                        |        | 48.9            | 46.7  | 100.0               |
|                       | Tropical Rainforest     | 1.6                        |        | 45.8            | 52.6  | 100.0               |

60.1% of original grouped cases correctly classified.

301

57.1% of cross-validated grouped cases correctly classified.

302



303

304

### Contributions to variation and loadings of variables on the principal components

305

The result of CATPCA revealed the extraction of two principal components (PCs) which explained 42.1% of the variation in the dataset (Table 8). The first PC (Eigenvalue = 8.386) explained 27.1% of the total variance and was greatly influenced by body length (0.832), body weight (0.830), compactness (0.812), massiveness (0.810), helmet length (-0.748), wattle width (0.755), chest circumference (0.741), wattle length (-0.730), helmet width (0.723), thigh length (0.713), shank length (0.642), long-leggedness (-0.616), head thickness (0.608), condition index (0.532) and neck circumference (0.391) (Figure 3). Agro-ecology (-0.751) was more associated with the second PC (Eigen value = 4.652) which accounted for 15.0% of the total variation and had its loadings for wing length (0.754), skin colour (-0.679), neck length (0.647), head length (-0.634), wing span (0.632), eye colour (-0.504), shank thickness (-0.490), helmet colour (0.467), helmet shape (-0.419), earlobe colour (0.390), wattle size (-0.359), plumage colour (-0.254), keel length (0.246), shank colour (0.207), trunk length (0.126). Wattle shape had equal loading for PC1 and PC2 (-0.088). However, the contributions of sex of birds to both PC1 (-0.094) and PC2 (-0.079) in terms of loadings were negligible. The high Cronbach's alpha value of 0.954 indicates the reliability of the CATPCA.

315

**Table 8.** Eigen value and the contribution of each qualitative and quantitative trait to the total variation in the principal components

316

317

318

| Traits | PC1 | PC2 | Total |
|--------|-----|-----|-------|
|--------|-----|-----|-------|

|                     |       |       |       |
|---------------------|-------|-------|-------|
| Plumage colour      | 0.002 | 0.065 | 0.066 |
| Skin colour         | 0.010 | 0.461 | 0.471 |
| Shank colour        | 0.029 | 0.043 | 0.072 |
| Eye colour          | 0.011 | 0.254 | 0.265 |
| Earlobe colour      | 0.030 | 0.152 | 0.182 |
| Helmet colour       | 0.003 | 0.218 | 0.221 |
| Helmet shape        | 0.003 | 0.175 | 0.178 |
| Wattle size         | 0.001 | 0.129 | 0.130 |
| Wattle shape        | 0.008 | 0.008 | 0.015 |
| Body weight         | 0.689 | 0.013 | 0.702 |
| Head length         | 0.035 | 0.402 | 0.437 |
| Head thickness      | 0.370 | 0.024 | 0.394 |
| Helmet length       | 0.560 | 0.002 | 0.562 |
| Helmet width        | 0.522 | 0.119 | 0.641 |
| Wattle length       | 0.533 | 0.001 | 0.535 |
| Wattle width        | 0.570 | 0.108 | 0.678 |
| Neck length         | 0.255 | 0.419 | 0.674 |
| Neck circumference  | 0.153 | 0.042 | 0.195 |
| Wing length         | 0.125 | 0.569 | 0.694 |
| Wing Span           | 0.053 | 0.400 | 0.452 |
| Body length         | 0.692 | 0.036 | 0.728 |
| Trunk Length        | 0.008 | 0.016 | 0.023 |
| Keel length         | 0.028 | 0.061 | 0.089 |
| Chest circumference | 0.549 | 0.074 | 0.623 |
| Thigh length        | 0.508 | 0.021 | 0.529 |
| Shank length        | 0.413 | 0.016 | 0.429 |
| Shank thickness     | 0.246 | 0.240 | 0.486 |
| Massiveness         | 0.656 | 0.014 | 0.671 |
| Compactness         | 0.660 | 0.059 | 0.719 |

|                           |        |        |        |
|---------------------------|--------|--------|--------|
| Long-leggedness           | 0.380  | 0.090  | 0.470  |
| Condition index           | 0.283  | 0.425  | 0.708  |
| Sex <sup>b</sup>          | 0.016  | 0.561  | 0.577  |
| Agro-ecology <sup>b</sup> | 0.009  | 0.006  | 0.015  |
| Eigen value               | 8.386  | 4.652  | 13.038 |
| % of Variance             | 27.052 | 15.006 | 42.059 |

b= Supplementary variable.

319

320

321

**Fig 3.** Individual quantitative and qualitative traits loadings on the principal components

323

324

### **Decision Trees of the Data Mining**

325

The tree diagram of the CHAID algorithm is depicted in Figure 4. Seven terminal nodes (Nodes 1, 2, 3, 5, 6, 7 and 8) were formed with the root

326

node (Node 0) showing the descriptive statistics of the birds in the three agro-ecological zones. The Chi-squared-based branch and node

327

distribution revealed that wing length was the variable of utmost importance in assigning the birds into their respective agro-ecological zone

328

followed by eye colour. Wing length (>18.10 cm) only was significantly ( $P < 0.001$ ) sufficient to discriminate between birds of the Southern

329

Guinea Savanna and those of Sudano-Sahelian and Tropical Rainforest zones. However, wing length (14.80-15.50 cm) together with eye colour

330

provided a better differentiation of the Sudano-Sahelian and Tropical Rainforest zones. While birds from the former had mostly brown and pink

331

eye colour, the later were associated mostly with white, black and bluish eye colour. With regard to model accuracy and validity, the 332  
resubstitution (probability of misclassifying an unseen instance) rate estimate of 0.420 was closely similar to the cross-validation error value of 333  
0.431 with standard error of 0.021, respectively. However, the Exhaustive CHAID decision tree formed seven terminal nodes (Figure 5). Here, 334  
wing length (>18.10 cm) was also the best single discriminant variable ( $P < 0.001$ ) to distinguish birds in the three agro-ecological zones. In 335  
contrast to what was obtained under CHAID, body length and eye colour were the two additional variables to differentiate the populations. Wing 336  
length (14.80-15.50 cm), body length ( $\leq 35.00$  cm) and eye colour permitted a better separation of the Sudano-Sahelian from Tropical 337  
Rainforest birds. Unlike what was observed in CHAID, birds from the former had mostly brown, white and pink eye colour while the later were 338  
characterized by black as well as bluish eye colour. As regards model accuracy and validity, the resubstitution rate and cross-validation error 339  
estimates were 0.406 and 0.409 with standard error of 0.021, respectively. 340

**Fig 4.** The association between the agro-ecologies and the phenotypic traits using CHAID 341

**Fig 5.** The association between the agro-ecologies and the phenotypic traits using Exhaustive CHAID 342  
343

## **Discussion**

 344  
345

Phenotypic variation of local animal resources indicates a genetic diversity that may be worth conserving for future uses while better 346  
understanding of the external features helps to facilitate the implementation of conservation policies aimed to ensure local resources survival 347  
[18]. Morphometric and phaneroptic approaches may be fundamental in the management of poultry considering the fact that they are fast and 348  
economically profitable [44]. The preponderance of more female birds in the present study could be attributed to the fact that smallholder poultry 349  
farmers normally keep more hens for the purpose of procreation, whereas the cocks are mostly slaughtered for consumption or sold to generate 350  
family income. We observed four major plumage colours (Pearl, Black, Brown and Pied). The varying colour patterns could be an indication that 351  
there are no pure genotypes of guinea fowl in Nigeria as there are no records of selective breeding of the indigenous stock birds. However, our 352  
colour patterns were somehow different from the dominant Pearl, Lavender, Black and White variations earlier reported in the country [48,49]. 353  
The slight variation may be occasioned by sampling coverage. In a similar study in Ghana, Agbolosu et al. [24] found that the predominant 354  
plumage colour was pearl grey colour (43.7%), whereas Traore et al. [25] reported that pied plumage colour (42.76%) was the most frequent 355  
among the provinces in Burkina Faso. The Nigerian birds shared brown eye colour (57.0%) with those of Atakora (Mountainous) dry savannah 356  
zone in Togo [50], and black shank colour with those of Kenya (95.6%) [19], Sudanian and Sudano-Guinean zones in Benin [51]. 357

Colour polymorphism defies evolutionary expectations as a single species may maintain a striking phenotypic variation [52]. The present variant 359  
phenotypes may be due to polymorphism [53], and might have evolved in local guinea fowls as adaptive measures for survival under varied 360  
environmental conditions. According to Getachew et al. [54] sustainable livestock production in the tropics requires adaptive genotypes which 361  
can withstand the undesirable effects of climate change and ensures optimal performance of the birds. In another study in a different species, 362  
Nigenda-Morales et al. [55] reported that the overall fitness of individuals in their environments may be affected by colour while Gong et al. et 363  
al. [56] considered colour variation as an environmental indicator, which provides clues for the study of population genetics and biogeography. 364  
The preponderance of Pearl plumage colour in our study might also be attributed to farmers' preference. It is congruous to the submission of 365  
Vignal et al. [6] that the prevalence of a particular colour could be attached to social-cultural value without any proven relationship with a 366  
biological function. This was buttressed by the report of González Ariza et al. [44] that certain phenotypic variables may be associated with 367  
consumers' trends and their cultural preferences. 368

Our findings on helmet shape are in agreement with the report on indigenous guinea fowls in Ghanaian where single shape (42.70%) 370  
predominated. The current observation on helmet shape where more females exhibited single shape is congruous to the submission of Angst et 371  
al. [57] that females have bony helmet more compact dorsoventrally while the males have taller helmet, with a more complex shape including 372

curvature of the posterior part along the dorsoventral axis. Similarly, Agbolosu et al. [24] reported that helmet shape is more pronounced in 373  
males than females. The observation on wattle is in consonance with findings of Umosen et al. [58] that on the average females had small wattle 374  
which was mostly carried flat. 375

In order to ascertain the genetic purity of the birds, the MCA result did not give a perfect clustering of the birds as phenotypic homogeneity of 377  
the Guinea fowl populations was evident in Sudano-Sahelian and Tropical Rainforest birds. This is in spite of the wide geographical distance and 378  
varying environmental conditions between the two zones. This suggests that colour traits alone might not be enough to distinguish between the 379  
three agro-ecological zones. Similar submission was made by Traore et al. [25] where in spite of the enormous environmental differences; there 380  
was morphological homogeneity in qualitative traits in guinea fowls in Burkina Faso. Brown et al. [59] also observed limited phenotypic and 381  
genetic diversity in local guinea fowl in northern Ghana. 382

Univariate analyses revealed significant differences among zones for most zoometric traits and calculated body indices, suggesting the possible 384  
influence of these zones on the evolutionary adaptation of the sheep population in terms of these. However, there was no clear cut pattern in the 385  
linear body measurements and indices especially of the Sudano-Sahelian and Tropical Rainforest birds. The body weight values of the present 386

study are comparable to the 1.40 kg reported by Orounladji et al. [51] for indigenous guinea fowls in a Sudanian zone in Benin, respectively. 387

They are however, higher than the range 1.08-1.33 kg reported for adult guinea fowl (*Numida meleagris*) in a humid zone of southern Nigeria 388

[60] and 1.275 kg obtained in Zimbabwe [61]. However, the indigenous birds are smaller in size when compared to their exotic counterparts. 389

While Agwunobi and Ekpenyong [62] obtained a live weight of 1.5 kg in guinea fowl of ‘Golden Sovereign’ broiler strain under tropical 390

conditions of Nigeria, Batkowska et al. [63] found a range of  $2166 \pm 42.5$ -  $2291 \pm 46.9$  kg in French commercial set. The differences may be 391

attributed to genetics, age, physiological stage of the birds, location and management systems employed by the poultry keepers. According to 392

Ahiagbe et al. (64), genetic make-up and management practices could affect the growth traits of guinea fowls. The exotic guinea fowls are 393

products of many years of robust selection and breeding [65,66]. Therefore, it is possible that crossbreeding between the indigenous and exotic 394

will result in birds of high genetic superiority in terms of meat yield and quality, egg production and adaptation. 395

396

Sexual dimorphism provides insight into the sexual- and natural-selection pressures being experienced by male and female animals of different 397

species [67]. At inter-population level especially with some morphometric traits, sexual dimorphism in the present study favoured male animals. 398

This concurs with the established literature that males generally possess larger body sizes than females in normal sexual size dimorphism in 399

birds [68]. The differential rate and duration of growth by the sexes may be responsible for the present observations. Also, high rate of breeding 400



in the populations could be another contributing factor to sexually dimorphic traits [69] as the birds have not been selected for the purpose of 401  
classical breeding. As obtained in the current study, Dudusola et al. [60] found male dominance in thigh length, body length, wing length, wing 402  
span, wattle length and chest circumference in Nigeria while Brown et al. [59] reported longer body and shank length including wingspan in 403  
indigenous guinea fowl in Ghana. In a related study in domestic chicken, Toalombo Vargas et al. [70] reported longer thigh length in male birds. 404

405

The canonical discriminant analysis showed high level of admixture especially between the Sudano-Sahelian and Tropical Rainforest 406  
populations. It could, therefore, be reported that the guinea fowls in Nigeria are unselected and largely of mixed populations. Northern Nigeria is 407  
the traditional home of indigenous helmeted guinea fowls in the country [71]. Considering the geographical proximity of the Southern Guinea 408  
Savanna and Sudano-Sahelian zones, one would have expected considerable intermixing of the guinea fowl populations. However, the reverse 409  
was observed in the present study as the intermingling between the birds in the Sudano-Sahelian and Tropical Rainforest zones was higher which 410  
could partly be due to transhumance especially by herders. The herders (mainly cattle rearers) from the northern parts of the country do move to 411  
the southern parts in search of natural pastures during the dry season. When they do so, they tend to carry along all their animals for settlement in 412  
their new locations. In that process, there is the possibility of exchange of birds between the settlers and their hosts. Such livestock mobility, 413  
which is seen as a means to an end [72] could have shaped poultry distribution pattern. 414

415

Suffice to say that the guinea fowl (*Numida meleagris*) population of Tropical Rainforest is an ecotype of the Sudano-Sahelian; which is quite 416  
different from *Numida ptilorhycha* that is indigenous to the deciduous rain forest zone of southern Nigeria [73]. This assertion is consolidated by 417  
the reports of Ayorinde [74] and Obike et al. [75] that *Numida meleagris*, domiciled in the north was spreading to other smallholder farming 418  
areas. Yakubu et al. [30] reported that movement of herders from one State to another can impact on livestock distribution pattern in Nigeria. In 419  
a related study, Whannou et al. [76] submitted that the mobility of herders could engender genetic introgression, thereby affecting animal genetic 420  
diversity. Another possible factor that could have contributed to the genetic erosion is inter-regional trade. It appears such live animal trade 421  
seemed to be more between livestock marketers in the Tropical Rainforest and Sudano-Sahelian zones than their Southern Guinea Savanna 422  
counterparts. According to Benton et al. [77], market dynamics in one location could drive biodiversity-damaging practices in other locations. In 423  
another study, Valerio et al. [78] highlighted the relevance of cross-border ties suggesting that markets play distinct structural roles in 424  
understanding animal movement patterns. 425

426

In spite of the admixture, the results of CATPCA, CHAID and Exhaustive CHAID revealed that some levels of separation can be obtained based 427  
on agro-ecology. Wing length was identified by the three models as contributing considerably to the discrimination of the guinea fowls. 428

However, the guinea fowls from the three agro-ecologies could best be separated using wing length, body length and eye colour. Both wing and 429  
body lengths are skeletal parameters that are not influenced by body condition, thereby providing good estimates of overall body size of the 430  
birds. It is possible that both traits are under similar selection pressure [79]. The importance of morphometric traits in population stratification 431  
has also been stressed in other avian species [80; 81]. 432

433

434

## **Conclusion**

435

The quantitative and qualitative traits of Nigerian guinea fowls predominantly were affected by agro-ecology. However, there was no clear cut 436  
variation and distribution pattern across the three agro-ecological zones. Although birds in the Southern Guinea Savanna zone appeared to have 437  
edge over others, the indigenous birds, generally were of small body weights and morphometric traits. This could be part of the animals' 438  
adaptation for survival under the low-inputs tropical environment. The clustering pattern of the traits especially between the Sudano-Sahelian 439  
and Tropical Rainforest birds revealed high level of admixture. This calls for further genomic studies to unravel the degree of genetic erosion 440  
and pave way for policy decisions geared towards effective management, conservation and genetic improvement of the indigenous birds. The 441

anticipated benefits include the development of hybrid improved guinea fowls for the empowerment of women and youth including 442  
improvement in food security and livelihoods. 443

444  
**Author Contributions:** Conceptualization: Abdulmojeed Yakubu, Praise Jegede, Ayoola Shoyombo and Ayotunde Adebambo; Data curation: 445  
Praise Jegede, Mathew Wheto, Samuel Vincent and Harirat Mundi; Formal analysis, Abdulmojeed Yakubu and Praise Jegede; Funding 446  
acquisition: Abdulmojeed Yakubu, Mathew Wheto, Ayoola Shoyombo, Ayotunde Adebambo, Mustapha Popoola, Osamede Osaiyuwu, 447  
Olurotimi Olafadehan, Olayinka Alabi, Comfort Ukim, Adeniyi Olayanju and Olufunmilayo Adebambo; Methodology: Abdulmojeed Yakubu, 448  
Ayoola Shoyombo, Ayotunde Adebambo, Mustapha Popoola, Osamede Osaiyuwu, Olurotimi Olafadehan, Olayinka Alabi, Comfort Ukim, 449  
Harirat Mundi, Adeniyi Olayanju and Olufunmilayo Adebambo; Supervision: Abdulmojeed Yakubu; Writing – original draft: Abdulmojeed 450  
Yakubu and Praise Jegede; Writing – review & editing: Mathew Wheto, Ayoola Shoyombo, Ayotunde Adebambo, Mustapha Popoola, Osamede 451  
Osaiyuwu, Olurotimi Olafadehan, Olayinka Alabi, Comfort Ukim, Samuel Vincent, Harirat Mundi, Adeniyi Olayanju and Olufunmilayo 452  
Adebambo. 453

454  
**Funding:** The study received financial assistance from the competitive National Research Fund of the Tertiary Education Trust Fund 455  
(TETFUND) of the Federal Republic of Nigeria through grant no TEF/DR&D/CE/NRF/UNI/ABEOKUTA/ STI/VOL.1. 456

**Data Availability Statement:** Data have been provided and can be found as supplementary materials 457

**Acknowledgments:** The authors are extremely grateful to the poultry keepers, extension agents and village heads and contact persons that 458  
facilitated data collection. 459

**Conflicts of Interest:** The authors declare that there is no conflict of interest. 460

467  
468  
469  
470  
471  
472  
473  
474  
475  
476  
477  
478  
479

## References

1. Mushi JR, Chiwanga GH, Amuzu-Aweh EN, Walugembe, M, Max RA, Lamont SJ, Kelly TR, Mollel EL, Msoffe PL, Dekkers J, Gallardo R, Zhou H, Muhairwa AP. Phenotypic variability and population structure analysis of Tanzanian free-range local chickens. BMC Vet. Res. 2020;16: 360. <https://doi.org/10.1186/s12917-020-02541-x> 480  
481  
482
2. Gopinath CR, Narasimha MHN, Nagaraja CS, Isloor S. Phenotypic characterization of indigenous chicken in Southern Karnataka, India. Ind. Poult. Sci. 2020;55: 17-22. 483  
484
3. Maharani D, Mustofa F, Sari APZNL, Fathoni A, Sasongko H, Hariyono DNH. Phenotypic characterization and principal component analyses of indigenous chicken breeds in Indonesia, Vet. World 2021;14: 1665-1676. doi: [www.doi.org/10.14202/vetworld.2021.1665-1676](http://www.doi.org/10.14202/vetworld.2021.1665-1676). 485  
486  
487
4. Murunga P, Kennedy GM, Imboma T, Malaki P, Kariuki D, Ndiema E, Obanda V, Agwanda B, Lichoti JK, Ommeh SC. Mitochondrial DNA D-Loop diversity of the helmeted guinea fowls in Kenya and its implications on HSP70 Gene functional polymorphism. BioMed Res. Int. 2018;7314038. <https://doi.org/10.1155/2018/7314038> 488  
489  
490
5. Teye GA, Gyawu PA. Guide to Guinea Fowl Production in Ghana, 1–14. Tamale, Ghana: Muetpress, 2002. 491

6. Vignal A, Boitard S, Thébault N, Dayo GK, Yapi-Gnaore V, Karim YA, Berthouly-Salazar C, Pálinkás-Bodzsár N, Guémené D, Thibaud-Nissen F, Warren WC, Tixier-Boichard M, Rognon XA. A guinea fowl genome assembly provides new evidence on evolution following domestication and selection in Galliformes. *Mol. Ecol. Res.* 2019;19: 997–1014. doi:10.1111/1755-0998.13017. 492  
493  
494
7. Onunkwo DN, Okoro IC. Egg Production Performance of Three Varieties of Guinea Fowls in Humid Tropics. *Int. J. Cur. Res. Rev.* 2015;7: 1–6. 495  
496
8. Yakubu A, Musa-Azara IS, Haruna HS. Village guinea fowl (*Numida Meleagris*) production systems in Nasarawa State, North Central Nigeria: Flock characteristics, husbandry and productivity. *Livest. Res. Rur. Devel.* 2014;26: 41. 497  
<http://www.lrrd.org/lrrd26/3/yaku26041.htm> . 498  
499
9. Zvakare P, Mugabe HP, Mutibvu T. Guinea fowl (*Numida meleagris*) production by small-holder farmers in Zimbabwe. *Trop. Anim. Health Prod.* 2018;50: 373-380. doi: 10.1007/s11250-017-1442-1. 500  
501
10. Molnár M, Lázár B, Sztán N, Végi B, Drobnyák A, Tóth R, Liptói K, Marosán M, Gócza E, Nandi S, McGrew MJ, Várkonyi EP. Investigation of the Guinea fowl and domestic fowl hybrids as potential surrogate hosts for avian cryopreservation programmes. *Sci. Rep.* 2019;9: 14284. <https://doi.org/10.1038/s41598-019-50763-3> 502  
503  
504
11. Soara AE, Talaki E, Tona K. Characteristics of indigenous guinea fowl (*Numida meleagris*) family poultry production in northern Togo. *Trop. Anim. Health Prod.* 2020;52: 3755–3767. <https://doi.org/10.1007/s11250-020-02413-4> 505  
506
12. ICAR. Improved Technology for sustainable Guinea Fowl production introduced. ICAR-Central Avian Research Institute, Izatnagar, Bareilly, Uttar Pradesh), 2021. <https://icar.org.in/content/improved-technology-sustainable-guinea-fowl-production-introduced-0>. 507  
508
13. Baimbill-Johnson N, Anaman KA, Amegashie D. Evaluation of the resource efficiency of guinea fowl production in the Savelegu-Nanton District of the Northern Region of Ghana. *J. Dev. Agric. Econ.* 2021;13: 142-155. DOI: 10.5897/JDAE2020.1223. 509  
510
14. Dharani P, Ushakumary S, Sundaram V, Joseph C, Ramesh G. Morphological analysis of testis of the Guinea fowl (*Numida meleagris*) under Tropical Savannah climate of India. *Int. J. Morphol.* 2018;36: 909-914. 511  
512
15. Dobrzański J, Calik J, Krawczyk J, Szwaczkowski T. Conservation of goose genetic resources in Poland - past and present status, *World's Poult. Sci. J.* 2019;75: 387-400. DOI: [10.1017/S0043933919000412](https://doi.org/10.1017/S0043933919000412) 513  
514
16. FAO. Phenotypic characterization of animal genetic resources. FAO Animal Production and Health Guidelines No. 11. Rome, 2012 515
17. Rofii A, Saraswati TR, Yuniwanti EYW. Phenotypic characteristics of Indonesian native chickens. *J. Anim. Behav. Biometeorol.* 2018;6: 56-61. doi.org/10.31893/2318-1265jabb.v6n3p56-61 516  
517

18. Sztandarski P, Marchewka J, Wojciechowski F, Riber AB, Gunnarsson S, Horbańczuk JO. Associations between neck plumage and beak darkness, as well as comb size measurements and scores with ranging frequency of Sasso and Green-legged Partridge chickens. *Poult. Sci.* 2021;100: 101340. <https://doi.org/10.1016/j.psj.2021.101340> 518  
519  
520
19. Panyako PM, Imboma T, Kariuki DW, Makanda M, Oyier PA, Malaki P, Ndiema EK, Obanda V, Agwanda B, Ngeiywa KJ, Lichoti J and Ommeh SC. Phenotypic characterization of domesticated and wild helmeted Guinea fowl of Kenya. *Livest. Res. Rur. Devel.* 2016; 28: 158. <http://www.lrrd.org/lrrd28/9/omme28158.html> 521  
522  
523
20. Kowalski A. A status of guinea fowl (*Numida meleagris*) and pheasant (*Phasianus colchicus*) population transferred from wildlife to the breeding assessed based on the histone H1.c' polymorphic variation. *Avian Biol. Res.* 2019;12: 145-151. doi:10.1177/1758155919860351 524  
525  
526
21. Shi L, Li Y, Bai H, Li D, Wang P, Jiang L, Fan J, Ge P, Ni A, Wang Y, Bian S, Zong Y, Isa AM, Tesfay HH, Ma H, Gong Y, Sun Y, Chen J. Phenotype characterization of crossed beaks in Beijing-You chickens based on morphological observation. *Poult. Sci.* 2020; 99 (11): 5197-5205. <https://doi.org/10.1016/j.psj.2020.07.046>. 527  
528  
529
22. Habimana R, Ngeno K, Mahoro J, Ntawubizi M Shumbusho F, Manzi M, Hirwa CA, Okeno TO. Morphobiometrical characteristics of indigenous chicken ecotype populations in Rwanda. *Trop. Anim. Health Prod.* 2020, 53, 24. doi: 10.1007/s11250-020-02475-4. IBM-SPSS. IBM Corp. Released 2020. 530  
531  
532
23. Sheriff O, Alemayehu K, Haile A. Phenotypic ranking experiments in identifying breeding objective traits of smallholder farmers in northwestern Ethiopia. *PLoS ONE* 2021;16: e0248779. <https://doi.org/10.1371/journal.pone.0248779> 533  
534
24. Agbolosu AA, Ahunu BK, Aboagye GS, Naazie A, Kayang B.B. Variation in some qualitative traits of the indigenous guinea fowl in Northern Ghana. *Global J. Anim. Sci. Res.* 2014; 2: 396–401. 535  
536
25. Traoré GF, Traoré A, Bayala B, Dayo K.-G, Tapsoba SA, Soudré A, Sanou M, Tindano K, Tamboura HH. Characterization and typology of Guinea fowl (*Numida meleagris*) farming systems in Burkina Faso. *Int. J. Adv. Res.* 2018;6: 6-21. DOI: <https://doi.org/10.21474/IJAR01/6177> 537  
538  
539
26. Brito NV, Lopes JC, Ribeiro V, Dantas R Leite JV. Biometric characterization of the Portuguese autochthonous hens breeds. *Animals (Basel)* 2021;11: 498. doi: 10.3390/ani11020498. 540  
541
27. Yakubu A, Ari MM. Principal component and discriminant analyses of body weight and conformation traits of Sasso, Kuroiler and indigenous Fulani chickens in Nigeria. *J. Anim. Plant Sci.* 2018;28: 46-55. 542  
543

28. Shoyombo AJ, Yakubu A, Adebambo AO, Popoola MA, Olafadehan OA, Wheto M, Alabi OO, Osaiyuwu HO, Ukim CI, Olayanju A, Adebambo OA. Characterization of indigenous helmeted guinea fowls in Nigeria for meat and egg production. *World's Poultry Science Journal*. 2021. <https://doi.org/10.1080/00439339.2021.1974287> 544-546
29. TRUST. Global Code of Conduct for Research in Resource-Poor Settings, 2018. DOI: [10.48508/GCC/2018.05](https://doi.org/10.48508/GCC/2018.05) 547
30. Yakubu A, Dahloun L, Gimba EG. Smallholder cattle farmers' breeding practices and trait preferences in a tropical guinea savanna agro-ecological zone. *Trop. Anim. Health Prod.* 2019;51: 1497-1506. <https://doi.org/10.1007/s11250-019-01836-y>. 548-549
31. BSADP. 2007. Bauchi State Agricultural Development Programme (BSADP): Bauchi State Fadama III project environmental baseline survey, 2007. Available in <http://www.fadama.net/html/index.php>-accessed on the 14th February, 2018. 550-551
32. Wikipedia. Climate of Bauchi, 2021. Accessed on 27<sup>th</sup> September, 2021 and available at <https://en.wikipedia.org/wiki/Bauchi>. 552
33. Mustapha A, Yakudima II, Alhaji M, Nabegu AB, Dakata FAG, Umar YA; Musa BU. Overview of the physical and human setting of Kano Region, Nigeria. *Res. J. Geog.* 2014;1: 1-12. 553-554
34. Abaje IB, Ndabula C, Garba AH. 2014. Is the changing rainfall patterns of Kano State and its adverse impacts an indication of climate change? *Eur. Sci. J.* 2014;10: 192-206. 555-556
35. Ayanlade A, Oluwatimilehin IA, Oladimeji AA, Atai G; Agbalajobi DT. Climate change adaptation options in farming communities of selected Nigerian ecological zones. In: Leal Filho, W.; Ogue, N.; Ayal, D.; Adeleke, L.; da Silva, I. (eds) *African Handbook of Climate Change Adaptation*. Springer, Cham., 2021. [https://doi.org/10.1007/978-3-030-45106-6\\_156](https://doi.org/10.1007/978-3-030-45106-6_156) 557-559
36. Omotayo FS, Oguntunde PG, Makinde OS, Olufayo, AA. The relationship between cocoa yield and climate variables in Oyo State, Nigeria using multiple linear regression and support vector machine analysis. *Int. J. Res. Sci. Innovat.* 2019; 6: 260-268. 560-561
37. AU-IBAR. Pictorial field guide for linear measurements of animal genetic resources. African Union InterAfrican Bureau for Animal Resources (AU-IBAR), Nairobi, Kenya, 2015. 47pp. 562-563
38. GFIA. Guinea Fowl International Association (GFIA), Lexington, TX 78947 USA, 2009. Retrieved from <http://www.guineafowlinternational.org>. on 5th April, 2020. 564-565
39. Yakubu A. Discriminant analysis of sexual dimorphism in morphological traits of African Muscovy ducks (*Cairina moschata*). *Arch. Zootec.* 2011;60: 1115-1123. [scielo.isciii.es/pdf/azoo/v60n232/art27.pdf](https://scielo.isciii.es/pdf/azoo/v60n232/art27.pdf). 566-567
40. Yakubu A, Bamidele O, Hassan WA, Ajayi FO, Ogundu UE, Alabi O, Sonaiya EB, Adebambo O.A. Farmers' choice of genotypes and trait preferences in tropically-adapted chickens in five agro-ecological zones in Nigeria. *Trop. Anim. Health Prod.* 2020;52: 95-107. <https://doi.org/10.1007/s11250-019-01993-0>. 568-570



41. JMP. JMP, Version 16. SAS Institute Inc., Cary, NC, 2021. 571
42. IBM SPSS Statistics for Windows, Version 27.0. Armonk, NY: IBM Corp, 2020. 572
43. Tabachnick BG, Fidell LS. Using Multivariate Statistics. Allyn and Bacon, Boston, USA, 2001. 966 pp. 573
44. González Ariza A, Arando Arbulu A, León Jurado JM, Navas González FJ, Delgado Bermejo JV, Camacho Vallejo ME. Discriminant canonical tool for differential biometric characterization of multivariety endangered hen breeds. *Animals* 2021;11: 2211. 574  
<https://doi.org/10.3390/ani11082211> 576
45. Martin-Collado D, Byrne TJ, Amer PR, Behrent MJ, MacLennan G, Kerslake JI. Analysing hidden patterns of farmers' preferences for farm performance characteristics that may be related to tail-docking practice decisions. *Proc. N. Zeal. Soc. Anim. Prod.* 2015;75: 205-209. 577  
578  
579
46. Tyasi TL, Eydurán E, Celik S. Comparison of tree-based regression tree methods for predicting live body weight from morphological traits in Hy-line silver brown commercial layer and indigenous Potchefstroom Koekoek breeds raised in South Africa. *Trop. Anim. Health Prod.* 2021;53: 7. <https://doi.org/10.1007/s11250-020-02443-y> 580  
581  
582
47. Çelik Ş, Eydurán E, Şengül AY, Şengül T. Relationship among egg quality traits in Japanese quails and prediction of egg weight and color using data mining algorithms. *Trop. Anim. Health Prod.* 2021;53: 382. <https://doi.org/10.1007/s11250-021-02811-2> 583  
584
48. Fajemilehin, S.O.K. Morphostructural Characteristics of Three Varieties of Greybreasted Helmeted Guinea Fowls in Nigeria. *Int. J. Morphol.* 2010;28: 557–562. doi:10.4067/S0717-95022010000200036. 585  
586
49. Ebegbulem VN, Asuquo BO. Growth Performance and Carcass Characteristics of the Black and Pearl Guinea Fowl (*Numida Meleagris*) and Their Crosses. *Glob. J. Pure Appl. Sci.* 2018;24: 11–16. doi:10.4314/gjpas.v24i1.2. 587  
588
50. Soara AE, Talaki E, Dayo G-K, Tona K. Morpho-biometric characterization of indigenous guinea fowl (*Numida meleagris*) populations in Northern Togo. *Int. J. Poult. Sci.*, 2020;19: 432-446. DOI: 10.3923/ijps.2020.432.446 589  
590
51. Orounladji BM, Tozo SK, Chrysostome CAAM. Morphobiometric Characteristics and Biodiversity of Indigenous Guinea Fowl (*Numida meleagris*) in Benin. *J. World Poult. Res.* 2021;11: 136-150. DOI: <https://dx.doi.org/10.36380/jwpr.2021.18> 591  
592
52. Brock KM, Baeckens S, Donihue CM, Martín J, Pafilis P., Edwards DL. Trait differences among discrete morphs of a color polymorphic lizard, *Podarcis erhardii*. *PeerJ.* 2020; 8: e10284. <https://doi.org/10.7717/peerj.10284> 593  
594
53. Birteeb PT, Boakye T. Variant forms of qualitative traits of indigenous chickens reared under extensive system in Tolon District, Ghana. *Anim. Prod. Sci.* 2020;60: 705-712. <https://doi.org/10.1071/AN19118> 595  
596

54. Getachew KF, Hans K, Tadelle D, Worku AS, Olivier H, Bastiaansen John WM. Species and phenotypic distribution models reveal population differentiation in Ethiopian indigenous chickens. *Front. Genet.* 2021;12: 1692 <https://www.frontiersin.org/article/10.3389/fgene.2021.723360> 597  
598  
599
55. Nigenda-Morales SF, Harrigan RJ, Wayne RK. Playing by the rules? Phenotypic adaptation to temperate environments in an American marsupial. *PeerJ* 2018;6: e4512 <https://doi.org/10.7717/peerj.4512> 600  
601
56. Gong Y, Zhao G, Yang H, Li Y, Tan M, Wang N, Ge J, Yang H, Feng L. Prevalence of Varied Coat Coloration in a Yellow-Throated Marten (*Martes flavigula*) Population. *Animals* 2021;11: 2838. <https://doi.org/10.3390/ani11102838>. 602  
603
57. Angst D, Barnoud J, Cornette R, Chinsamy A. sex and ontogenetic variation in the crest of *Numida meleagris*: Implications for crested vertebrates. *Anat. Rec.* 2020;303: 1018-1034. <https://doi.org/10.1002/ar.24275> 604  
605
58. Umosen AD, Onyeanusi BI, Salami SO, Nzalak JO, Imam J, Ibe CS. Observations on the Wattles of Adult Helmeted Guinea Fowls (*Numida Meleagris Galeata*). *Int. J. Poul. Sci.* 2008, 7, 1204–1206. doi:10.3923/ijps.2008.1204.1206. 606  
607
59. Brown MM, Alenyorege B, Teye GA, Roessler R. Phenotypic diversity, major genes and production potential of local chickens and guinea fowl in Tamale, northern Ghana. *Asian-Australas. J. Anim. Sci.* 2017;10: 1372-1381. doi: 10.5713/ajas.17.0145. 608  
609
60. Dudusola IO, Bashiru HA, Adewuyi AA. Analysis of morphometric traits in heterogeneous population of adult guinea fowl (*Numida meleagris*). *Nig. J. Anim. Prod.* 2021;48: 6-17. doi.org/10.51791/njap.v48i2.2925 610  
611
61. Musundire MT, Halimani TE, Chimonyo M. Effect of age and sex on carcass characteristics and internal organ weights of scavenging chickens and helmeted guinea fowls. *J. Appl. Anim. Res.* 2018;46: 860–867. doi:10.1080/09712119.2017.1411266. 612  
613
62. Agwunobi LN, Ekpenyong TE. Nutritive and economic value of guinea fowl (*Numida meleagris*) production in developing countries. *J. Sci. Food Agric.* 1990;52: 301–308. doi:10.1002/jsfa.2740520303. 614  
615
63. Batkowska J, Drabik K, Karwowska M, Ahsan U, Raza I, Adamczuk A, Horecka B. Growth performance and meat quality of meat-type guinea fowl fed different commercial diets. *Arch. Anim. Breed.* 2021;64: 325-334. doi: 10.5194/aab-64-325-2021. 616  
617
64. Ahiagbe KMJ, Amuzu-Aweh EN, Bonney P, Nyameasem JK, Avornyo FK, Adenyo C, Amoah KO, Naazie A, Kayang BB. Comparison of early growth and survivability in indigenous guinea fowls from Northern Ghana. *Trop. Anim. Health Prod.* 2021;53: 89. <https://doi.org/10.1007/s11250-020-02510-4> 618  
619  
620
65. Koné GA, Kouassi GF, Kouakou NDV, Kouba M. Diagnostic of guinea fowl (*Numida meleagris*) farming in Ivory Coast. *Poult. Sci.* 2018;97: 4272–4278. doi:10.3382/ps/pey290. 621  
622

66. Koné GA, Good M, Kouba M. Performance of guinea fowl fed hevea seed meal or cashew nut meal as a partial substitute for soya bean meal. *Animal* 2020;14: 206–214. doi:10.1017/S175173111900185X. 623  
624
67. McLean CJ, Garwood RJ, Brassey CA. Sexual dimorphism in the Arachnid orders. *PeerJ* 2018;6: 625  
e5751 <https://doi.org/10.7717/peerj.5751> 626
68. Ganbold O, Reading RP, Wingard GJ, Paek WK, Tsolmonjav P, Jargalsaikhan A, Khuderchuluun O, Azua J. Reversed sexual size dimorphism: body size patterns in sexes of lesser kestrels (*Falco naumanni*) in the Ikh Nart Nature Reserve, Mongolia. *J. Asia-Pac. Biod.* 2019;12: 363-368: <https://doi.org/10.1016/j.japb.2019.04.003>. 627  
628  
629
69. Morales M, Gigena DJ, Benitez-Vieyra SM, Valdez DJ. Subtle sexual plumage color dimorphism and size dimorphism in a South American colonial breeder, the Monk Parakeet (*Myiopsitta monachus*). *Avian Res.* 2020;11: 18. <https://doi.org/10.1186/s40657-020-00204-x> 630  
631  
632
70. Toalombo Vargas PA, Navas González FJ, Landi V, Jurado JML, Bermejo JVD. 2019. Sexual dimorphism and breed characterization of Creole hens through biometric canonical discriminant analysis across Ecuadorian agroecological areas. *Animals (Basel)* 2019;10: 32. doi: 10.3390/ani10010032. 633  
634  
635
71. NBS-FMARD. National Bureau of Statistics/Federal Ministry of Agriculture and Rural Development (NBS-FMARD) Collaborative Survey on National Agriculture Sample Survey (NASS) 2010/2011 (Draft Report), Abuja, Nigeria, 2012. 194 pp. 636  
637
72. Turner MD, Schlecht E. Livestock mobility in sub-Saharan Africa: A critical review. *Pastoralism* 2019;9: 13. 638  
<https://doi.org/10.1186/s13570-019-0150-z> 639
73. Baruwa OI, Sofoluwe N.A. Profitability and resource use efficiency of guinea fowl (*Numida meleagris*) production under tropical conditions. *J. Livest. Sci.* 2016;7: 97-106 640  
641
74. Ayorinde KL. The Spice of Life. The Seventy-First Inaugural Lecture, Thursday, 11th March, 2004, University of Ilorin, Ilorin, Nigeria. Published by the Library and Publications Committee, 2004. 58pp. 642  
643
75. Obike OM, Oke UK, Azu KE. Comparison of egg quality traits of pearl and black varieties of guinea fowl in a rain-forest zone of Nigeria. Proc. 36<sup>th</sup> Ann. Conf., Nig. Soc. Anim. Prod. (NSAP). Abuja, 2011. pp 19-21. 644  
645
76. Whannou HRV, Afatondji CU, Ahozonlin MC, Spanoghe M, Lanterbecq D, Demblon D, Houinato MRB, Dossa LH. Morphological variability within the indigenous sheep population of Benin. *PLoS ONE* 2021;16: e0258761. 646  
<https://doi.org/10.1371/journal.pone.0258761> 647  
648

77. Benton TG, Bieg C, Harwatt H, Pudasaini R, Wellesley L. Food system impacts on biodiversity loss: Three levers for food system transformation in support of nature. The Royal Institute of International Affairs Chatham House 10 St James's Square, London SW1Y 4LE, 2021. 649  
650  
651
78. Valerio VC, Walther OJ, Eilittä M, Cissé B, Muneeppeerakul R, Kiker GA. Network analysis of regional livestock trade in West Africa. PLoS ONE 2020;15: e0232681. <https://doi.org/10.1371/journal.pone.0232681> 652  
653
79. Wiklund CG. Body length and wing length provide univariate estimates of overall body size in the Merlin. The Condor 1996;98: 581-588. 654  
655
80. Otecko NO, Ogali I, Ng'ang'a SI, Mauki DH, Ogada S, Moraa GK, Lichoti J, Agwanda B, Peng MS, Ommeh SC, Zhang YP. Phenotypic and morphometric differentiation of indigenous chickens from Kenya and other tropical countries augments perspectives for genetic resource improvement and conservation. Poult. Sci. 2019;98: 2747–2755. <https://doi.org/10.3382/ps/pez097> 656  
657  
658
81. Henry L, Biquand V, Craig AJFK, Hausberger M (2015) Sexing Adult Pale-Winged Starlings Using Morphometric and Discriminant Function Analysis. PLoS ONE 10(9): e0135628. <https://doi.org/10.1371/journal.pone.0135628> 659  
660

**Supporting information**

**S1-**Fig 1-5 (ZIP)

**S2-** Data 1-3 (ZIP)

661  
662  
663  
664  
665  
666  
667
